# Supplementary material for: ERK1 and ERK2 MAPK are key regulators of distinct gene sets in zebrafish embryogenesis
Source: PubMed Central journal article supplement (PMC2390552; doi:10.1186/1471-2164-9-196), 2008-04-28
Supplement: 1471-2164-9-196-S2.pdf [file 1471-2164-9-196-S2.pdf]

24hpf

48hpf

Wildtype

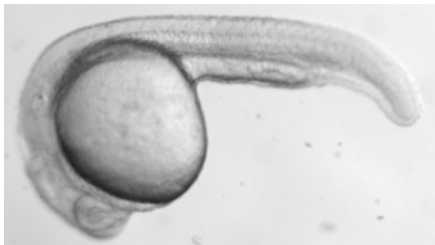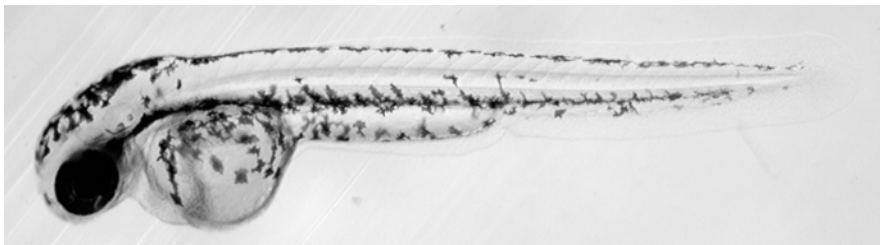

ERK1MO

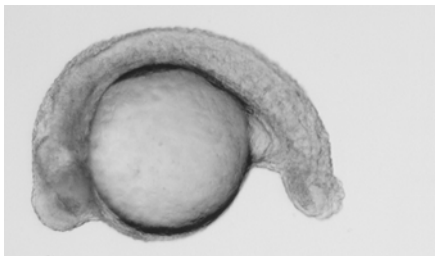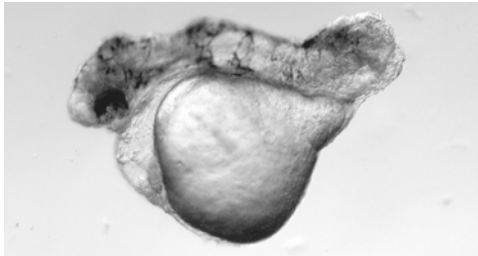

**Supplemental figure:** surviving ERK1 morpholino injected embryos, compared to wildtype embryos at 24 and 48hpf.
